# Supplementary material for: Electrochemical Coupling of Biomass‐Derived Acids: New C8 Platforms for Renewable Polymers and Fuels
Source: PubMed Central journal article supplement (PMC5324636; doi:10.1002/cssc.201601271), 2016-12-22
Supplement: CSSC-10-166-s001.pdf [file CSSC-10-166-s001.pdf]

## Supporting Information

### **Electrochemical Coupling of Biomass-Derived Acids: New C<sub>8</sub> Platforms for Renewable Polymers and Fuels**

Linglin Wu,<sup>[a]</sup> Mark Mascia,<sup>\*[a]</sup> Thomas J. Farmer,<sup>[b]</sup> Sacha Pérocheau Arnaud,<sup>[b]</sup> and Maria-Angelica Wong Chang<sup>[a]</sup>

cssc\_201601271\_sm\_miscellaneous\_information.pdf

## Supporting Information

### Electrochemical Coupling of Biomass-Derived Acids: New C<sub>8</sub> Platforms for Renewable Polymers and Fuels

Linglin Wu,<sup>[a]</sup> Mark Mascal,\*<sup>[a]</sup> Thomas J. Farmer,<sup>[b]</sup> Sacha Pérocheau Arnaud<sup>[b]</sup> and Maria-Angelica Wong Chang<sup>[a]</sup>

[a] Dr. L. Wu, Prof. M. Mascal, Ms. M.-A. Wong Chang

Department of Chemistry  
University of California Davis  
1 Shields Avenue  
Davis, CA 95616 (USA)  
E-mail: mjmascal@ucdavis.edu

[b] Dr. T. J. Farmer, Mr. S. Pérocheau Arnaud

Green Chemistry Centre of Excellence  
Department of Chemistry  
University of York  
Heslington, York, YO10 5DD (UK)

## Contents

|                                                                                                                                                                  |         |
|------------------------------------------------------------------------------------------------------------------------------------------------------------------|---------|
| General                                                                                                                                                          | S2      |
| Optimization of the Kolbe electrolysis of levulinic acid                                                                                                         | S3-S4   |
| Experimental procedures for polymers                                                                                                                             | S5-S6   |
| NMR Spectra                                                                                                                                                      | S7-S14  |
| Fuel analysis by gas chromatography                                                                                                                              | S15     |
| Polymer analysis by DSC and TGA                                                                                                                                  | S16-S17 |
| Comparison of the glass transition temperature (T <sub>g</sub> ) of polyesters of 2,7-octanediol <b>3</b> with previously reported aliphatic-aromatic polyesters | S18     |
| References                                                                                                                                                       | S18     |

## General

All materials were used as received. Levulinic acid (98%), KOH (85%) Al(OTf)<sub>3</sub>, *p*-toluenesulfonic acid monohydrate (PTSA.H<sub>2</sub>O), terephthaloyl chloride, methanol, anhydrous toluene, and anhydrous pyridine were purchased from Sigma-Aldrich. Palladium on activated carbon was purchased from Strem Chemical. 2,7-Octanedione **2** was dried over molecular sieves prior to use in polymerizations.

<sup>1</sup>H NMR spectra were recorded using a Bruker 600 NMR spectrometer operating at 600 MHz. <sup>13</sup>C NMR spectra were recorded on the same instrument at an operating frequency of 150 MHz. An HP 6002A DC power supply was used in the electrolysis reactions.

Gel permeation chromatography was used to determine polymer molecular weight and was carried out using a set (PSS SDV High) of three analytical columns (300 x 8mm, particle diameter 5 μm) of 1000, 10<sup>5</sup> and 10<sup>6</sup> Å pore sizes, plus guard column, supplied by Polymer Standards Service GmbH (PSS) and installed in a PSS SECcurity GPC system. Elution was done with stabilised tetrahydrofuran at 1ml/min with a column temperature of 23 °C and detection by refractive index. 20 μL of a 1 mg/mL sample in THF was injected for each measurement and eluted for 40 min. Calibration was carried out in the molecular weight range 400 – 2x10<sup>6</sup> Da using ReadyCal polystyrene standards supplied by Sigma Aldrich.

Modulated differential scanning calorimetry (MDSC) experiments were carried out on a TA Instruments Q2000 under a nitrogen atmosphere at a heating rate of 10 °C/min up to a temperature of 200 °C, and using a sample mass of approximately 10 mg. The T<sub>g</sub> values were reported from second heating scans.

Thermogravimetric analysis (TGA) was performed on a PL Thermal Sciences STA 625 thermal analyzer. About 10 mg of accurately weighed sample in an aluminum sample cup was placed into the analyzer furnace with a N<sub>2</sub> flow of 100 ml/min and heated from room temperature to 625 °C at a heating rate of 10 °C/min.

## Optimization of the Kolbe electrolysis of levulinic acid

Kolbe electrolysis of levulinic acid **1** was carried out with platinum plate electrodes as working and counter electrodes (1.5 x 1.5 cm<sup>2</sup>; distance between parallel electrodes = 12 mm) in a methanolic KOH solution in an undivided glass cell with magnetic stirring. Constant current was applied at the stated temperature for the stated periods of time (see Tables S1 and S2). The reaction mixture was acidified to pH=2-3 with 1 M aq HCl and then evaporated under vacuum. The conversion and yield were determined by NMR using 1,4-dioxane as an internal standard. To the residue was added 1M NaOH (50 mL) and the mixture was extracted with dichloromethane (50 ml x 3). The combined organic phase was washed with saturated brine and dried over Na<sub>2</sub>SO<sub>4</sub>. The solution was filtered through a short plug of silica gel and concentrated to give 2,7-octanedione **2** as a light yellow solid.

**Table S1.** Summary of experimental conditions (reaction time, levulinic acid concentration, methanolic KOH concentration, temperature, and current density) and the corresponding yields and conversions for the Kolbe electrolysis of levulinic acid carried out at 4 mmol scale.

| Run | Time (min) | [LA] (M) | [KOH] (M) | T (°C) | Current density (mA/cm <sup>2</sup> ) | Yield (%) | Conversion (%) |
|-----|------------|----------|-----------|--------|---------------------------------------|-----------|----------------|
| 1   | 32         | 0.4      | 0.1       | 0      | 178                                   | 60        | 100            |
| 2   | 16         | 0.4      | 0.1       | 0      | 178                                   | 53        | 81             |
| 3   | 16         | 0.4      | 0.1       | 22     | 178                                   | 58        | 86             |
| 4   | 32         | 0.8      | 0.1       | 22     | 178                                   | 55        | 81             |
| 5   | 16         | 0.4      | 0.4       | 22     | 178                                   | 29        | 62             |
| 6   | 16         | 0.4      | 0.4       | 22     | 356                                   | 37        | 83             |
| 7   | 16         | 0.4      | 0.075     | 22     | 178                                   | 64        | 92             |

**Table S2.** Summary of experimental conditions (reaction time, levulinic acid concentration, methanolic KOH concentration, temperature, and current density) and the corresponding yields and conversions for the Kolbe electrolysis of levulinic acid carried out at 8 mmol, 16 mmol, 32, and 64 mmol scale.

| Run | Scale (mmol) | Time (min) | [LA] (M) | [KOH] (M) | T (°C) | Current density (mA/cm <sup>2</sup> ) | Yield (%) | Conversion (%) |
|-----|--------------|------------|----------|-----------|--------|---------------------------------------|-----------|----------------|
| 1   | 8            | 32         | 0.4      | 0.075     | 22     | 178                                   | 56        | 87             |
| 2   | 16           | 64         | 0.4      | 0.075     | 22     | 178                                   | 58        | 86             |
| 3   | 32           | 128        | 0.4      | 0.075     | 22     | 178                                   | 56        | 85             |
| 4   | 64           | 256        | 0.4      | 0.075     | 22     | 178                                   | 48        | 84             |

## Experimental procedures for polymers

### Poly(2,7-octanediol)terephthalate 4

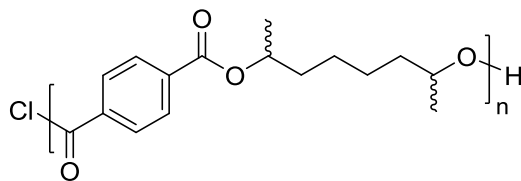

Terephthaloyl chloride (0.528 g, 2.60 mmol) was dissolved in anhydrous toluene (1.5 mL) in a dry 25 mL round-bottom flask which was sealed with the septum. The flask was cooled in an ice/water bath and continually purged with argon. Separately, 2,7-octanediol (0.380 g, 2.60 mmol) was dissolved in a mixture of anhydrous pyridine (1.7 mL) and anhydrous toluene (1.5 mL). This mixture was added via syringe to the argon purged diacid chloride solution with slow agitation by a magnetic stirrer bar. Upon mixing the reaction become cloudy and slightly viscous, with viscosity increasing over time. After 6 h the flask was removed from the ice/water bath and allowed to reach rt, being left to stir slowly. At 48 h from the start of reaction (42 hours at rt), further terephthaloyl chloride (5 mg) in anhydrous toluene (0.2 mL) was added to the reaction flask, and this was repeated again after 76 h. After a total reaction time of 92 h (86 h at rt) the excess pyridine and toluene was mostly removed *in vacuo* and the solid sticky residue was triturated twice with dry methanol (15 mL). The sticky crude product was re-dissolved in toluene (0.2 mL) and this solvent was subsequently removed under vacuum. The solid product was dried under high vacuum (<1 mbar) overnight to give poly(2,7-octanediol) terephthalate 4 as a light yellow, sticky solid (0.452 g, 63% yield based on a C.R.U. of polymer of 276.33 g mol<sup>-1</sup>).

### Poly(2,7-octanediol)-2,5-furanoate 5

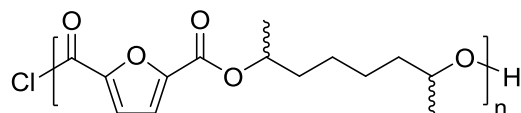

Furan-2,5-dicarbonyl chloride (0.502 g, 2.60 mmol) was dissolved in anhydrous toluene (1.5 mL) in a dry 25 mL round-bottom flask which was sealed with a septum. The flask was cooled in an ice/water bath and continually purged with argon. Separately, 2,7-octanediol (0.380 g, 2.60 mmol) was dissolved in a mixture of

anhydrous pyridine (1.7 mL) and anhydrous toluene (1.5 mL). This mixture was added via syringe to the argon purged diacid chloride solution with slow agitation by a magnetic stirrer bar. Upon mixing the reaction become cloudy and slightly viscous, with viscosity increasing over time. After 6 h the flask was removed from the ice/water bath and allowed to reach rt, being left to stir slowly. At 48 hours from the start of reaction (42 hours at rt) further terephthaloyl chloride (5 mg) in anhydrous toluene (0.2 mL) was added to the reaction flask, and this was repeated again after 76 h. After a total reaction time of 92 h (86 h at rt) the excess pyridine and toluene was mostly removed under vacuum and the solid sticky residue was triturated twice with dry methanol (15 mL). The sticky crude product was re-dissolved in 5 mL of toluene and this solvent subsequently removed under vacuum, this step was found to reduce residual pyridine in the product. The sticky crude product was re-dissolved in toluene (0.2 mL) and this solvent was subsequently removed under vacuum. The solid product was dried under high vacuum (<1 mbar) overnight to give poly(2,7-octanediol)-2,5-furanoate as an orange/yellow glassy solid (0.376 g, 54% yield based on a C.R.U. of polymer of 266.29 g mol<sup>-1</sup>).

# NMR spectra

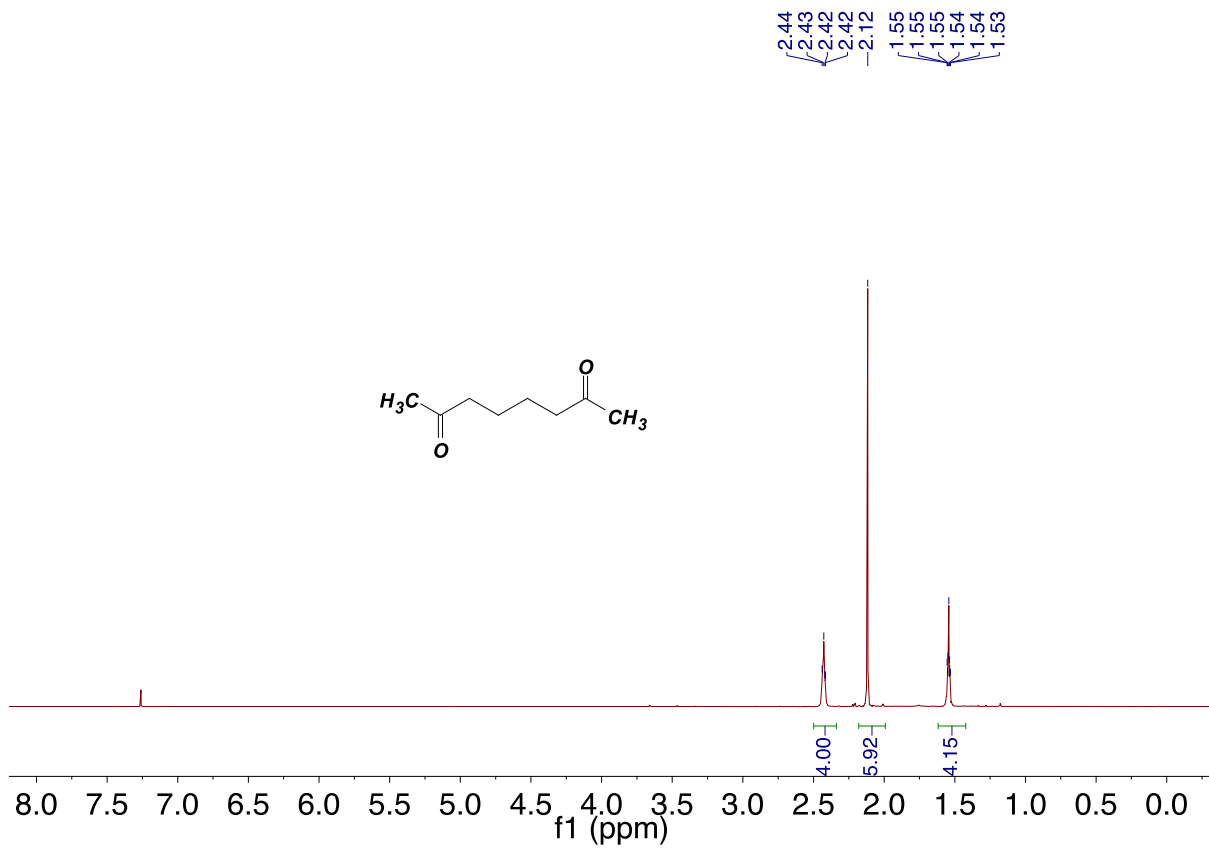

**Figure S1.** <sup>1</sup>H NMR spectrum of 2,7-octanedione **2** in CDCl<sub>3</sub>



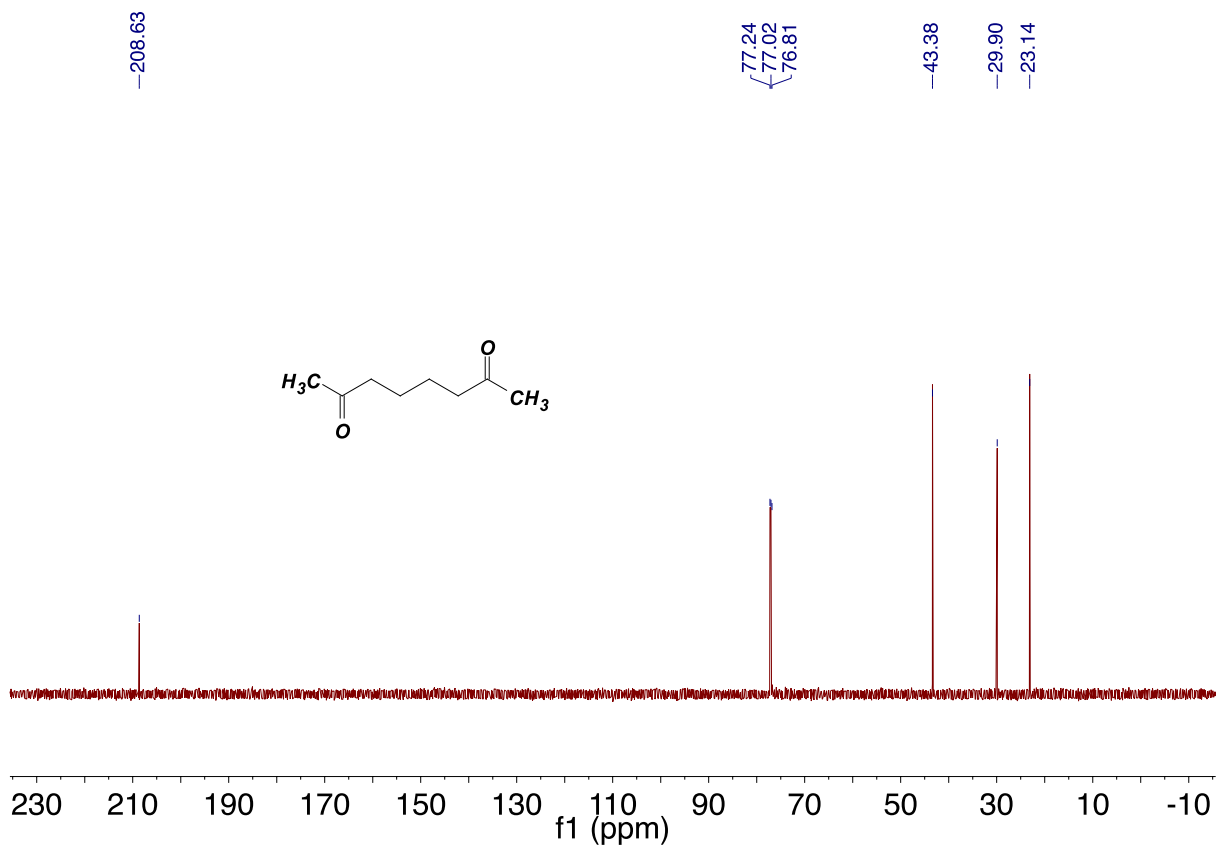

**Figure S2.**  $^{13}\text{C}$  NMR spectrum of 2,7-octanedione **2** in  $\text{CDCl}_3$

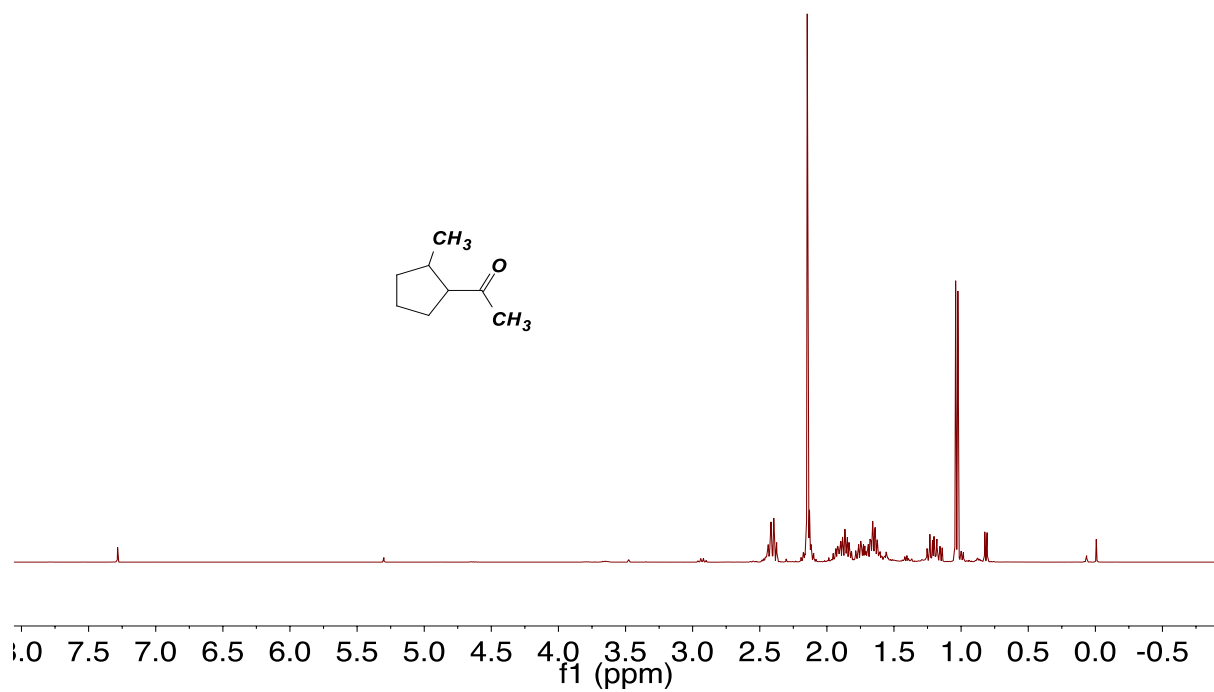

**Figure S3.** <sup>1</sup>H NMR spectrum of the crude product from the intramolecular aldol condensation-hydrogenation of **2** (in CDCl<sub>3</sub>) (main product **6** shown).

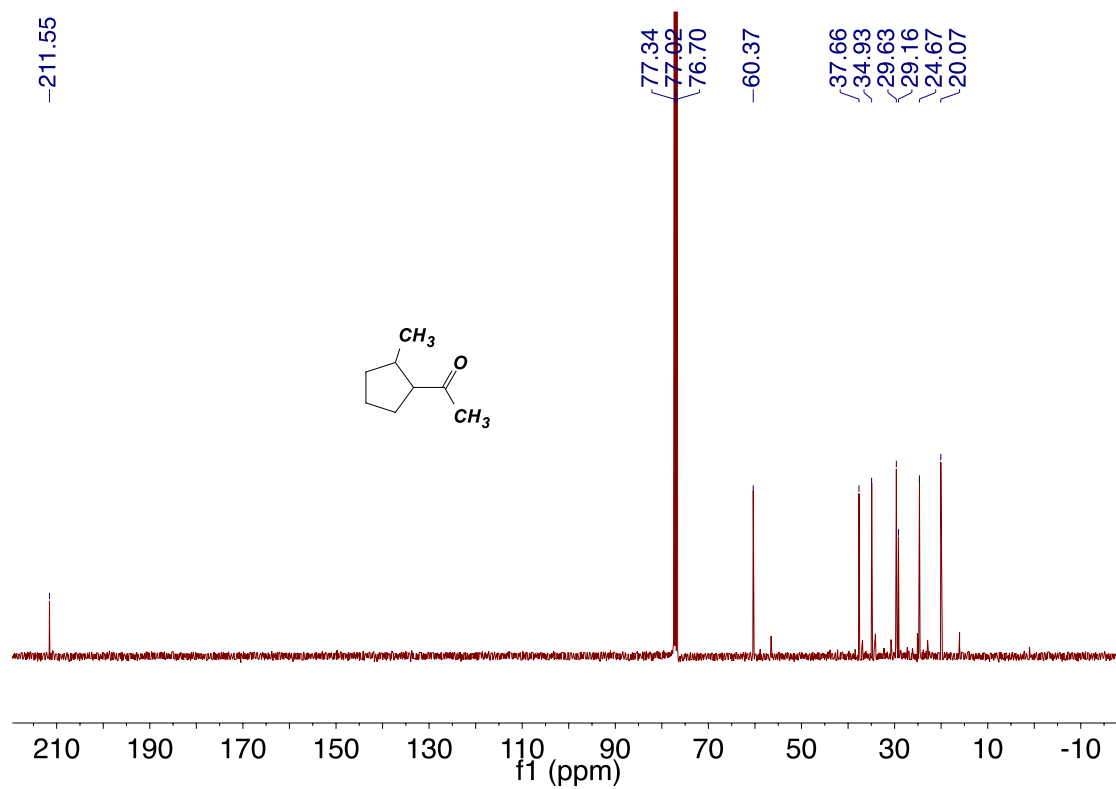

**Figure S4.**  $^{13}\text{C}$  NMR spectrum of the crude product from the intramolecular aldol condensation-hydrogenation of **2** (in  $\text{CDCl}_3$ ) (main product **6** shown).

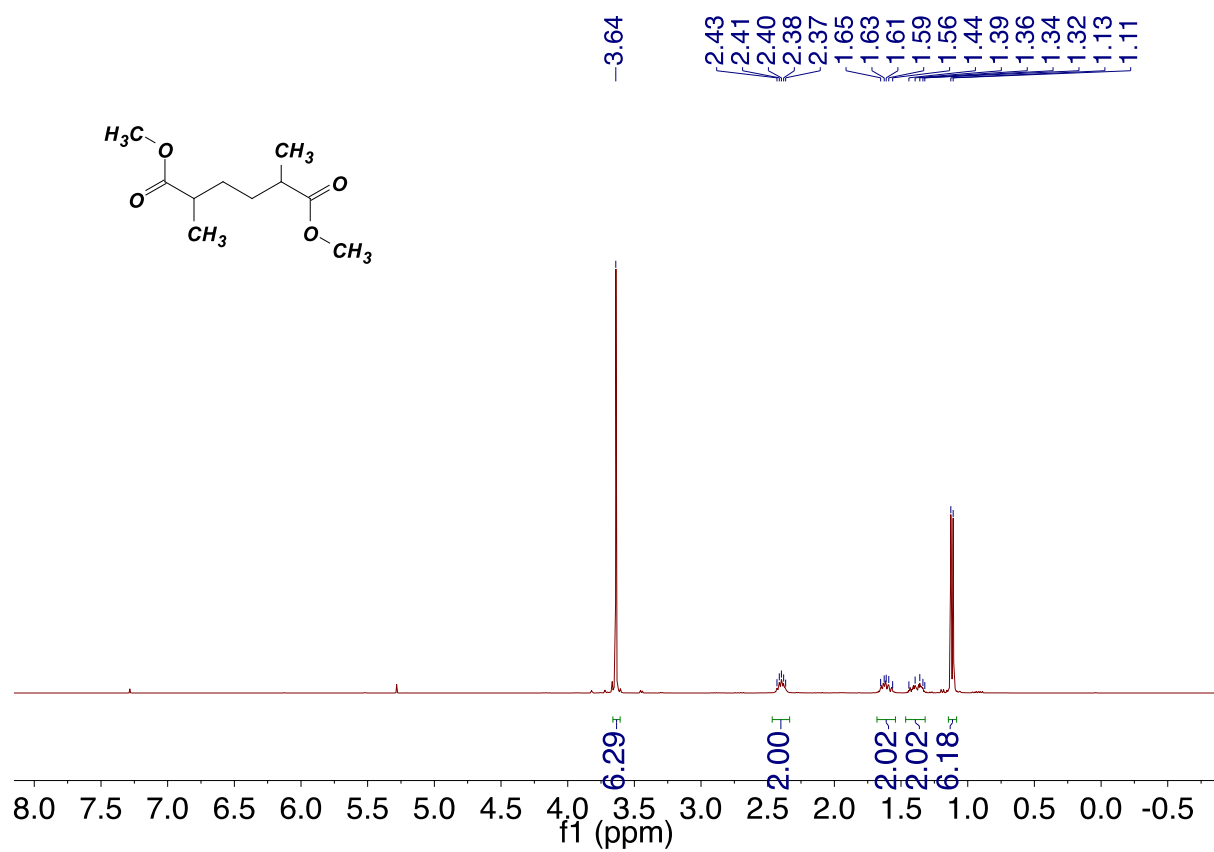

**Figure S5.** <sup>1</sup>H NMR spectrum of dimethyl 2,5-dimethyladipate **14** in CDCl<sub>3</sub>.

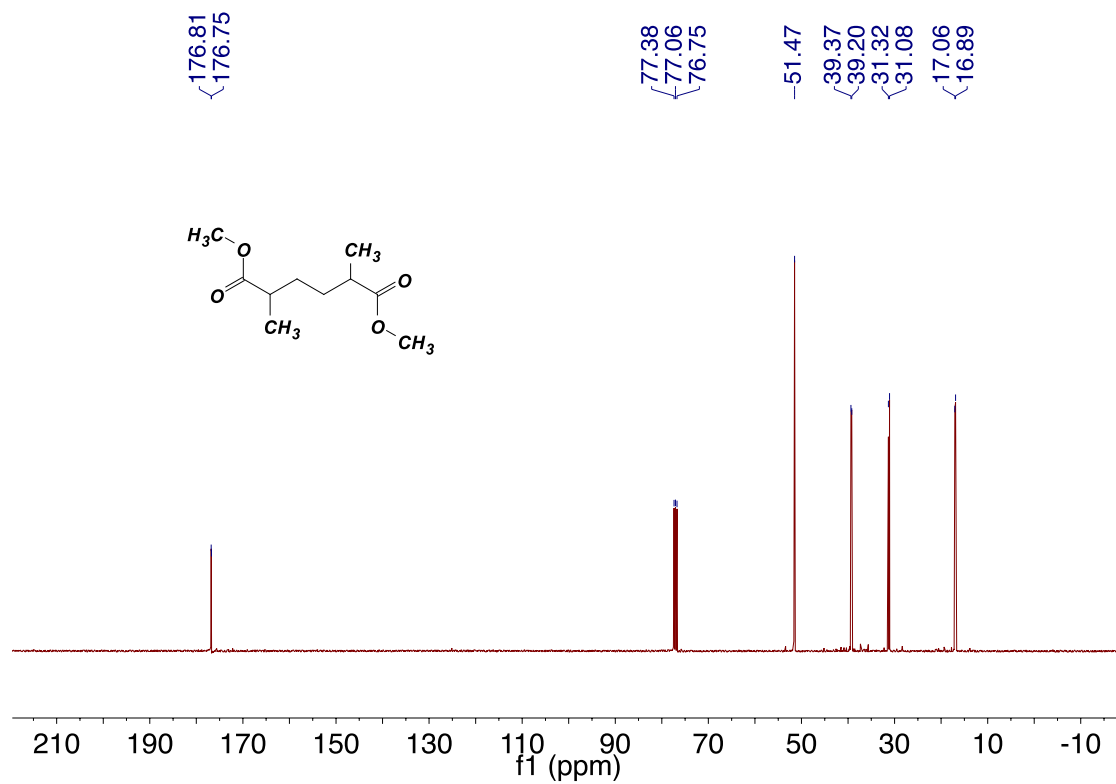

**Figure S6.**  $^{13}\text{C}$  NMR spectrum of dimethyl 2,5-dimethyladipate **14** in  $\text{CDCl}_3$ .

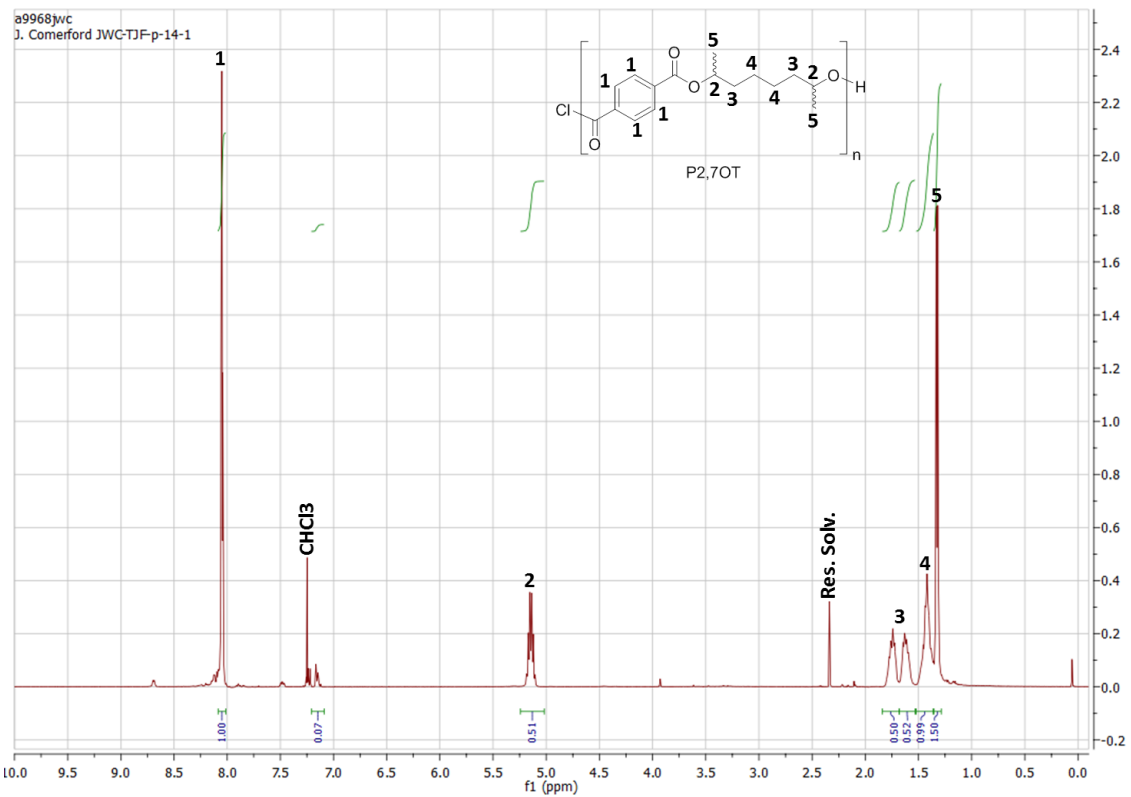

**Figure S7.** <sup>1</sup>H NMR spectrum of poly(2,7-octanediol)terephthalate 4

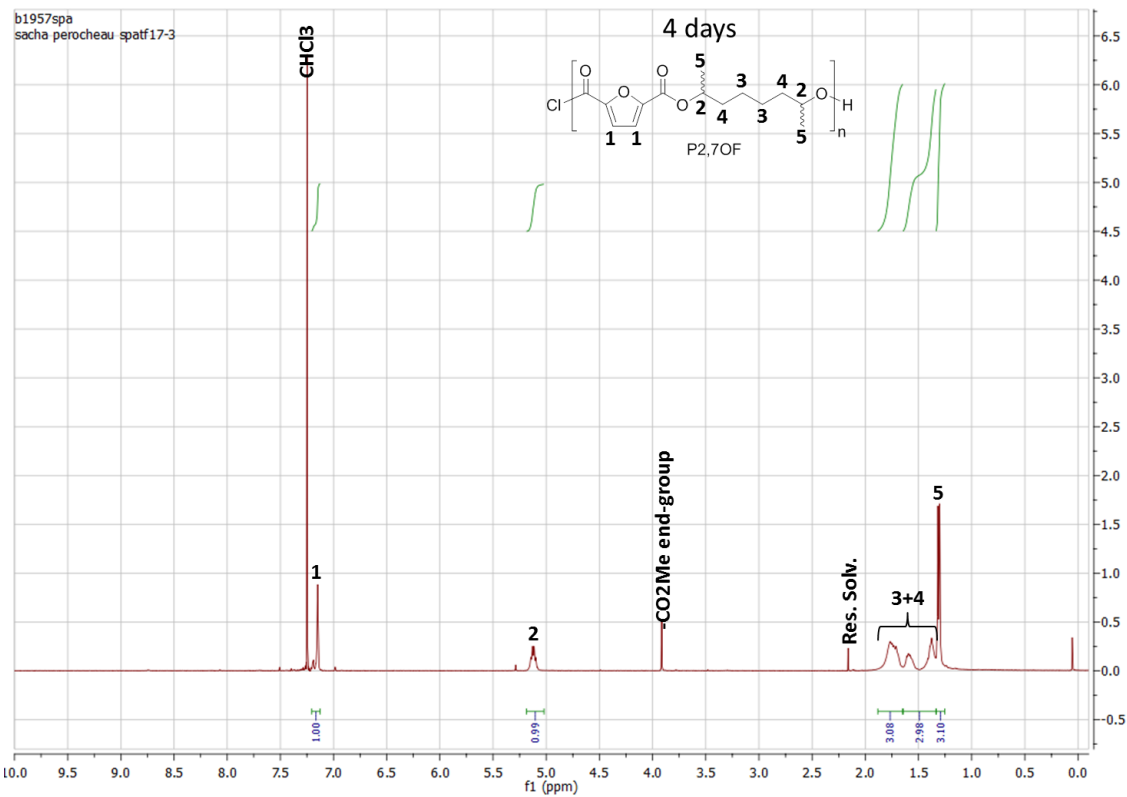

**Figure S8.** <sup>1</sup>H NMR spectrum of poly(2,7-octanediol)-2,5-furanoate **5**.

## Fuel analysis by gas chromatography

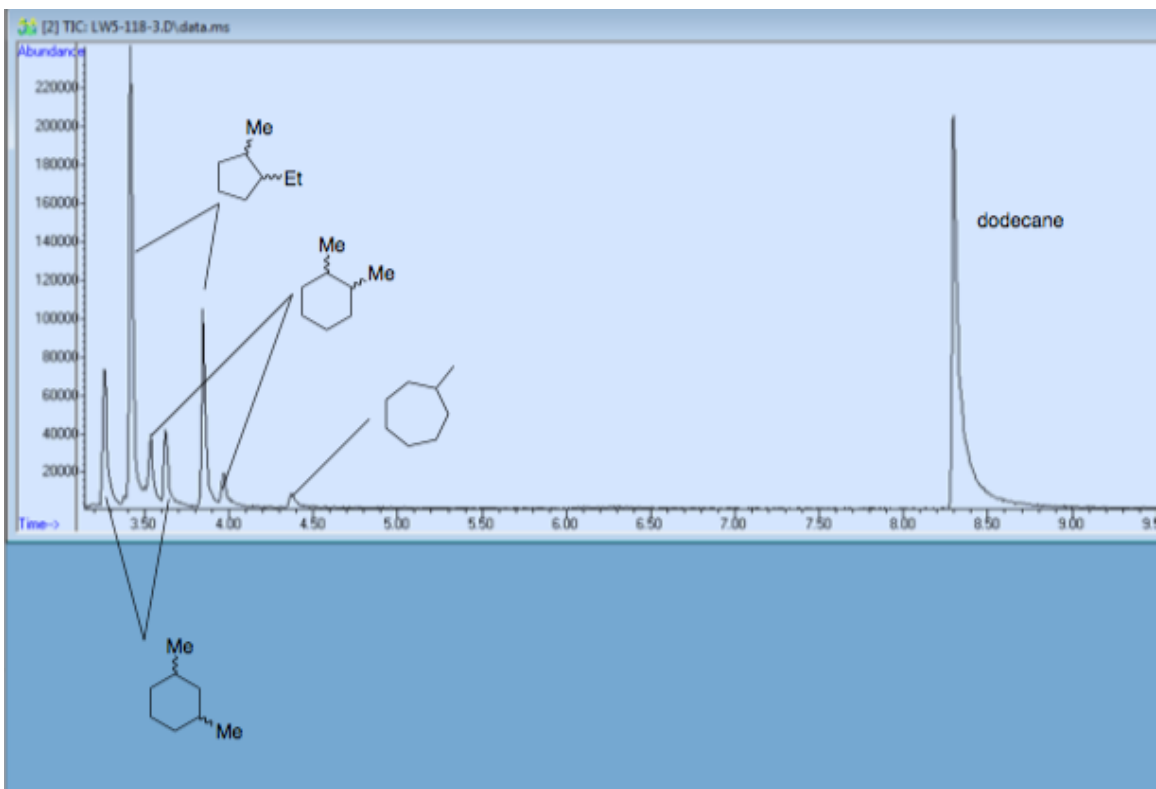

**Figure S9.** GC trace of the cycloalkanes resulting from the hydrogenation of **6** and **7**, with dodecane as internal standard.



## Polymer analysis by DSC and TGA

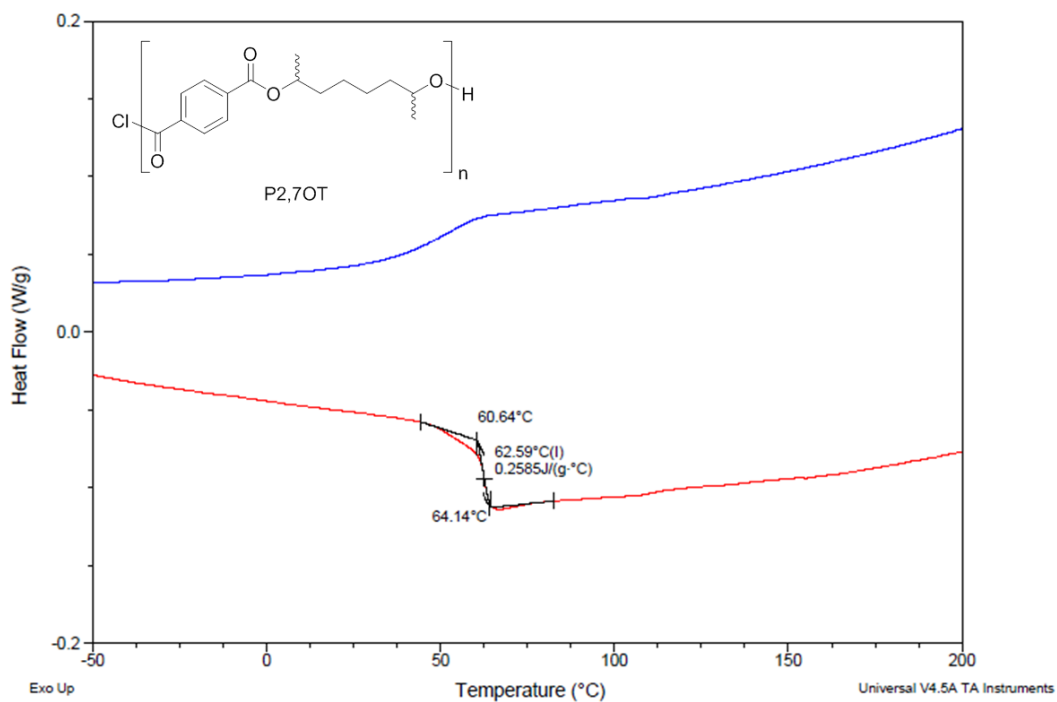

Figure S10. Modulated DSC trace of 4.

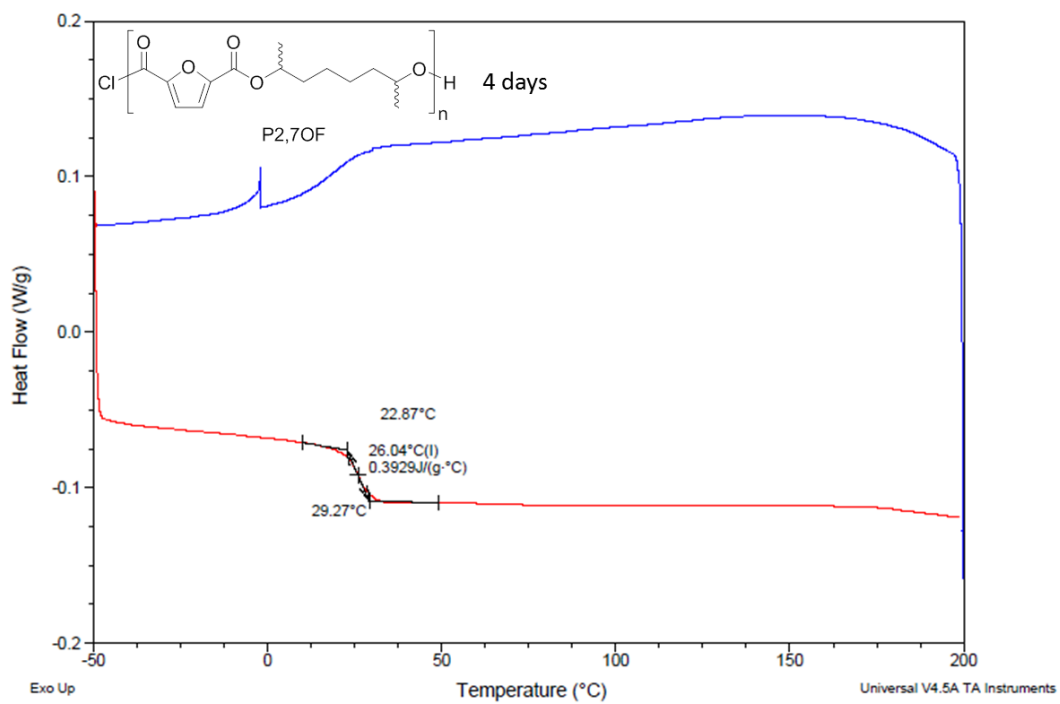

Figure S11. Modulated DSC trace of 5.

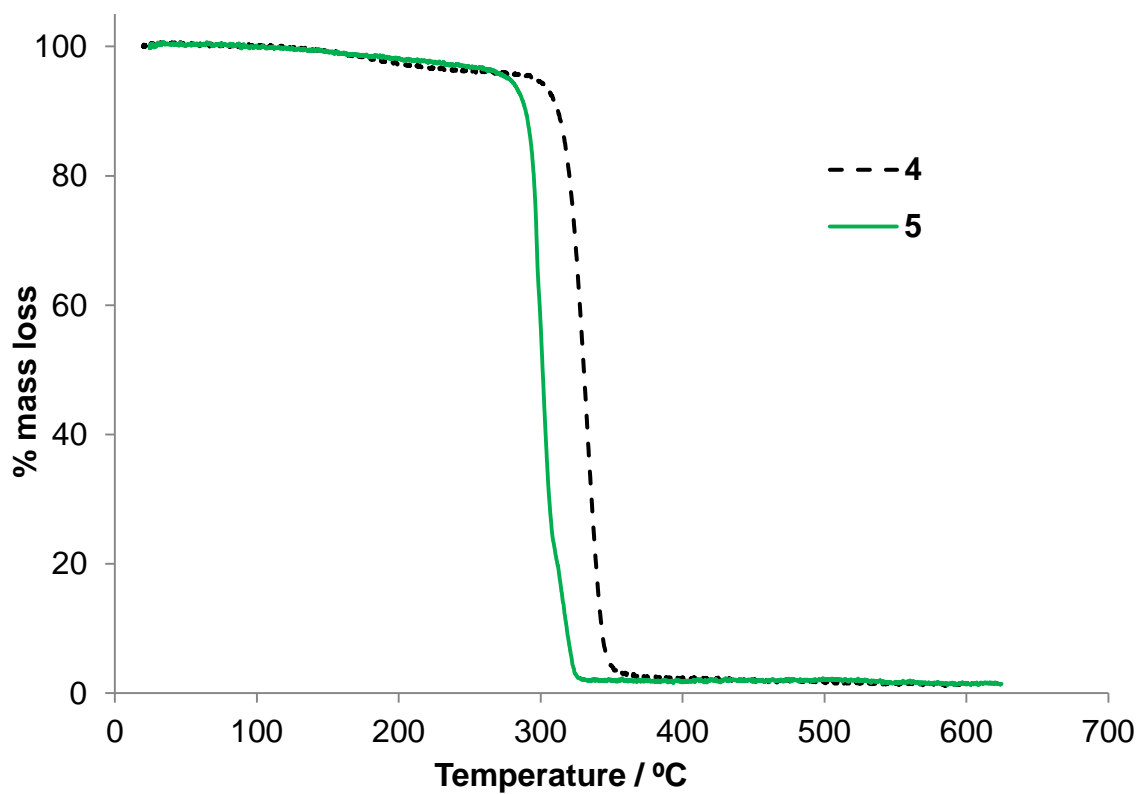

**Figure S12.** Thermogravimetric profiles for polymers 4 and 5.

**Table S3.** Comparison of the glass transition temperature ( $T_g$ ) of polyesters of 2,7-octanediol **3** with previously reported aliphatic-aromatic polyesters.

| Diacid unit                       | Diol unit      | $T_g / ^\circ\text{C}$ | Source    |
|-----------------------------------|----------------|------------------------|-----------|
| Terephthalic acid (TA)            | 1,4-butanediol | 41                     | [1]       |
|                                   | 2,3-butanediol | 127                    | [2]       |
|                                   | 1,6-hexanediol | 6                      | [3]       |
|                                   | 1,8-octanediol | 5                      | [3]       |
|                                   | 2,7-octanediol | 63                     | This work |
| 2,5-furandicarboxylic acid (FDCA) | 1,4-butanediol | 26-36                  | [4]       |
|                                   | 2,3-butanediol | 87                     | [5]       |
|                                   | 1,6-hexanediol | 12-16                  | [4]       |
|                                   | 1,8-octanediol | 6-13                   | [4]       |
|                                   | 2,7-octanediol | 26                     | This work |

## References

[1] M. Pyda, E. Nowak-Pyda, J. Heeg, H. Huth, A. A. Minakov, M. L. Di Lorenzo, C. Schick, B. Wunderlich, *J. Polym. Sci., Part B: Polym. Phys.* **2006**, *44*, 1364-1377.

[2] W. J. Jackson, J. J. Watkins, US 4,600,768, 1986.

[3] T. H. Ng, H. L. Williams, *Makromol. Chem.* **1981**, *182*, 3323-3330.

[4] Y. Jiang, A. J. J. Woortman, G. O.R. Alberda van Ekenstein, K. Loos, *Polym. Chem.* **2015**, *6*, 5198-5211.

[5] S. Thiyagarajan, W. Vogelzang, R. J. I. Knoop, A. E. Frissen, J. van Haveren, D. S. van Es, *Green Chem.* **2014**, *16*, 1957-1966.
